# Supplementary material for: Functional characterization of the selective pan-allele anti-SIRPα antibody ADU-1805 that blocks the SIRPα–CD47 innate immune checkpoint
Source: PubMed Central journal article supplement (PMC6894304; doi:10.1186/s40425-019-0772-0), 2019-12-04
Supplement: 40425_2019_772_MOESM3_ESM.pdf [file 40425_2019_772_MOESM3_ESM.pdf]

**A**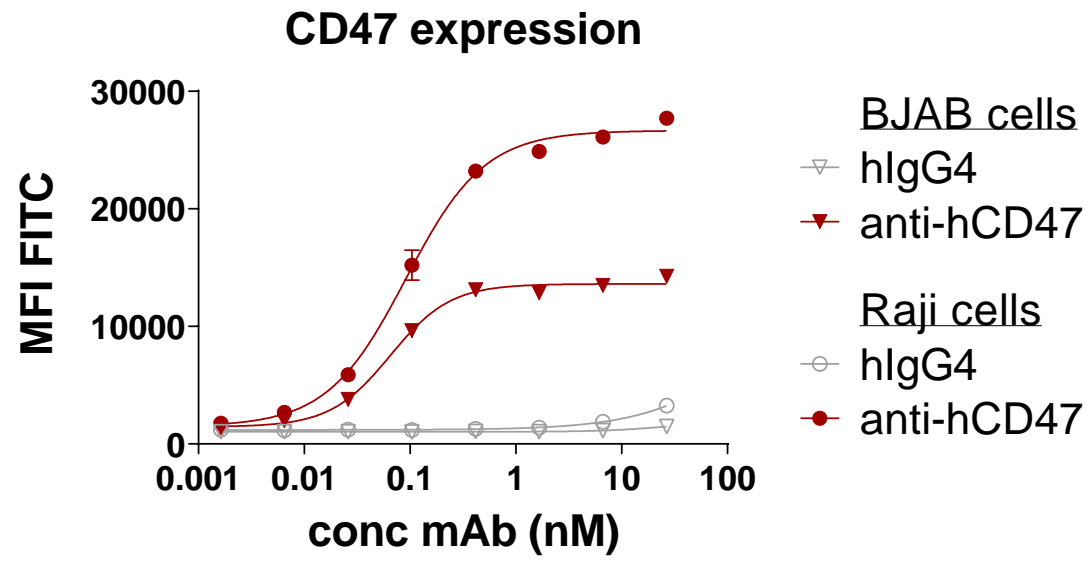**B**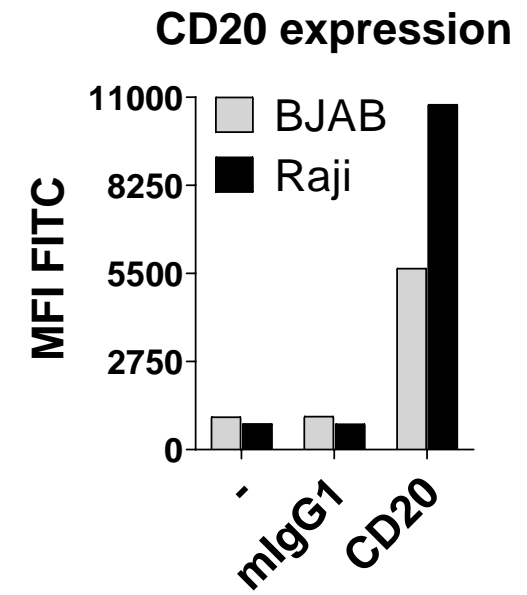

**Additional file 3: Figure S1.** CD20 and CD47 expression in human Burkitt's lymphoma cell lines. (A) CD47 expression was determined in BJAB and Raji human Burkitt's lymphoma cell lines. (Mean  $\pm$  SD is shown). (B) CD20 expression was determined in BJAB and Raji human Burkitt's lymphoma cell lines.
