# Supplementary material for: Functional characterization of the selective pan-allele anti-SIRPα antibody ADU-1805 that blocks the SIRPα–CD47 innate immune checkpoint
Source: PubMed Central journal article supplement (PMC6894304; doi:10.1186/s40425-019-0772-0), 2019-12-04
Supplement: 40425_2019_772_MOESM4_ESM.pdf [file 40425_2019_772_MOESM4_ESM.pdf]

**A****Binding to mouse SIRP receptor family members**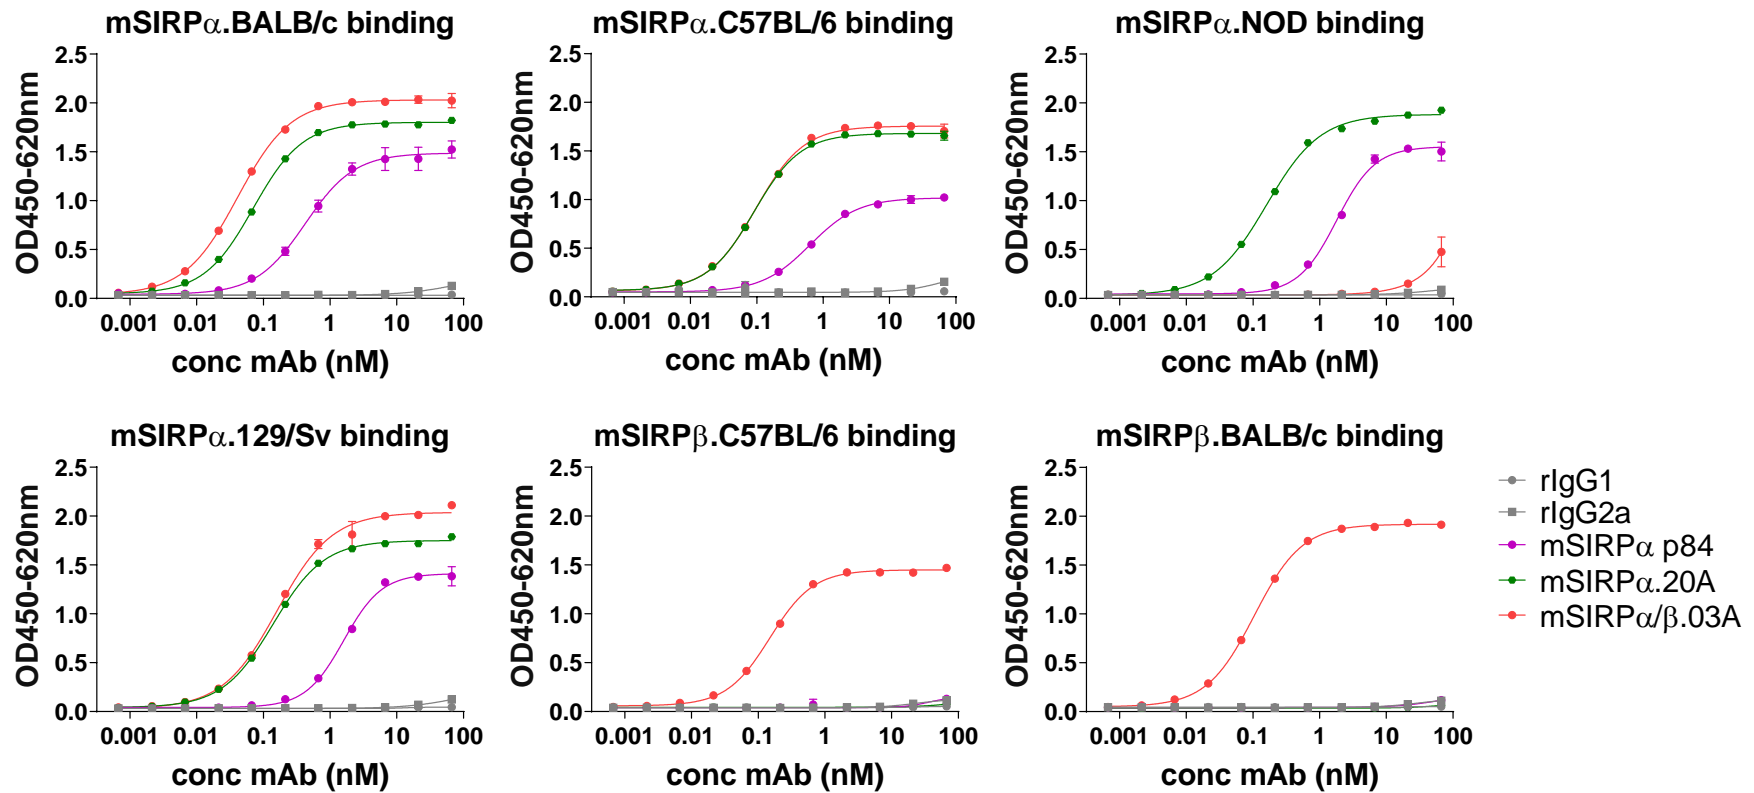**B****Binding to mouse macrophages and blocking CD47 binding to mouse SIRP $\alpha$** 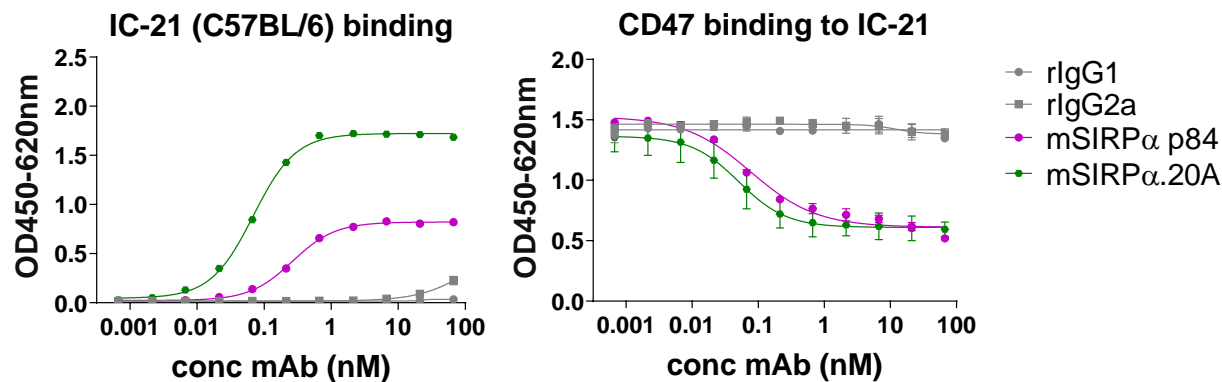

**Additional file 4: Figure S2.** Specificity of anti-mouse SIRP $\alpha$  antibodies.

(A) Hybridoma-purified anti-mSIRP $\alpha$  antibodies selectively bind mouse SIRP $\alpha$  transiently expressed on CHO-K1 cells without obvious cross-reactivity towards mouse SIRP $\beta$ . (B) Anti-mSIRP $\alpha$  antibodies bind to the C57BL/6 mouse-derived peritoneal macrophage cell line IC-21 and block CD47 binding. (A, B: Mean  $\pm$  SD; representative of n = 2 is shown).
