# Supplementary material for: Functional characterization of the selective pan-allele anti-SIRPα antibody ADU-1805 that blocks the SIRPα–CD47 innate immune checkpoint
Source: PubMed Central journal article supplement (PMC6894304; doi:10.1186/s40425-019-0772-0), 2019-12-04
Supplement: 40425_2019_772_MOESM6_ESM.pdf [file 40425_2019_772_MOESM6_ESM.pdf]

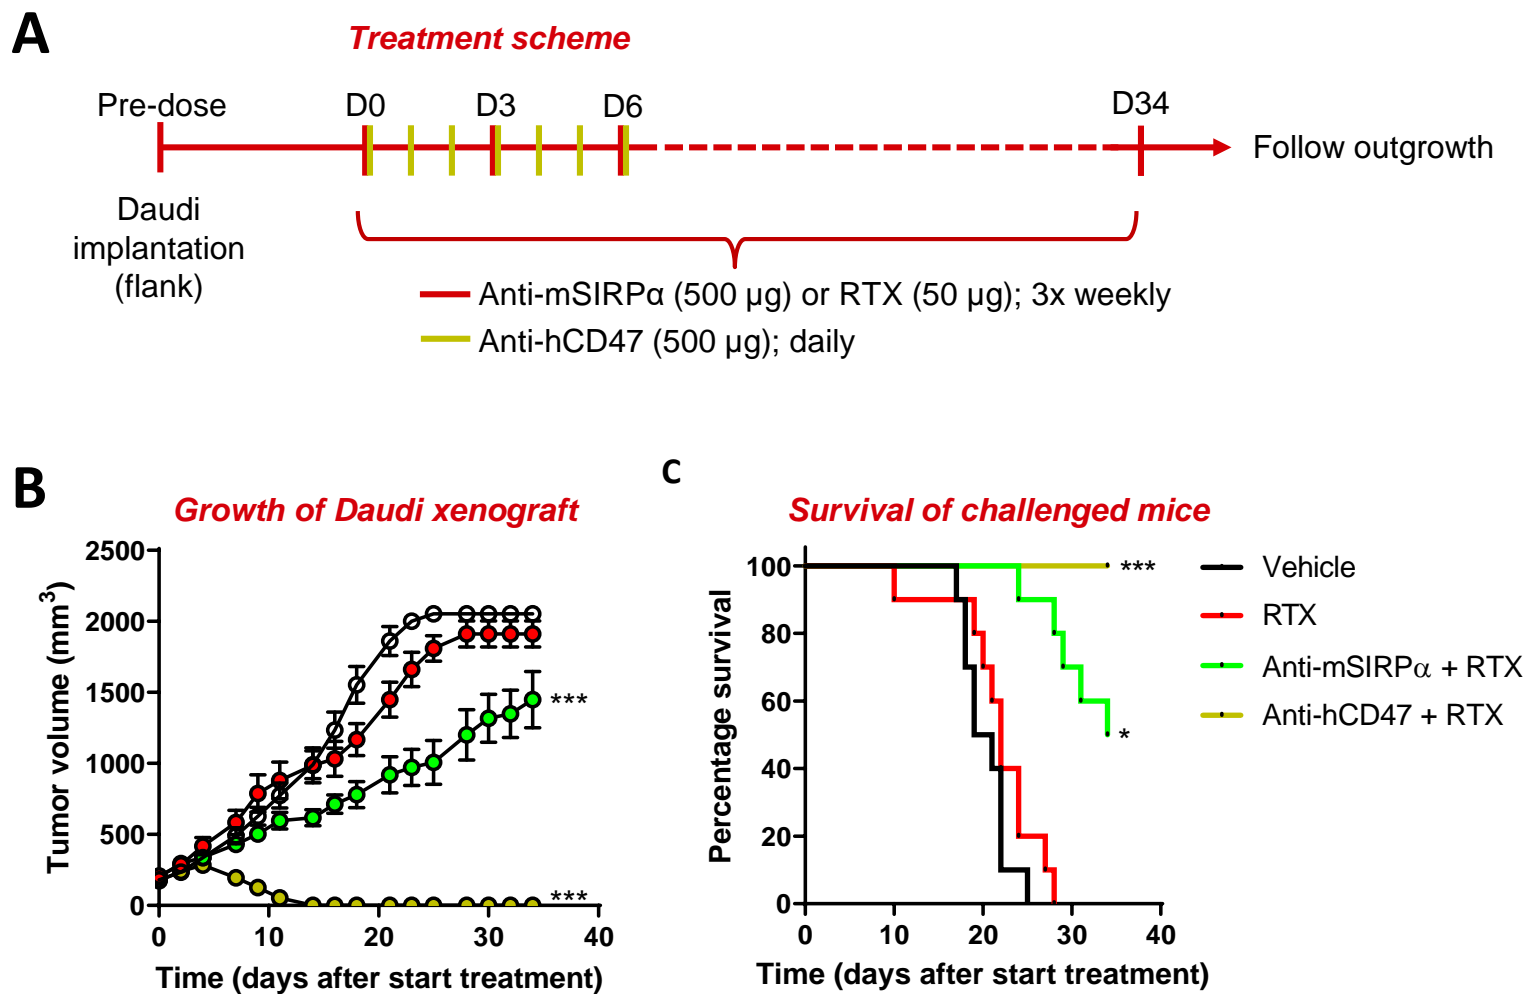

**Additional file 6: Figure S3.** Anti-mSIRP $\alpha$  improves the efficacy of rituximab in NSG mice.

(A) Treatment schedule depicting the moment of tumor cell engraftment (day 0), antibody treatment, and tumor outgrowth until the moment of sacrifice (tumor volume  $\geq 2000 \text{ mm}^3$ ). (B) Anti-mSIRP $\alpha$  inhibits the growth of Daudi tumor cells. NSG mice were subcutaneously engrafted with  $0.75 \times 10^6$  Daudi (human Burkitt's lymphoma) cells. Once tumors reached a size of  $233 \text{ mm}^3 \pm 78 \text{ mm}^3$  mice were administered three times per week with 50  $\mu$ g rituximab (RTX) alone or in combination with 500  $\mu$ g anti-mSIRP $\alpha$  by intraperitoneal injection. Alternatively, RTX was combined with a daily administration of 500  $\mu$ g anti-hCD47 (B6H12) which served as a positive control. (Mean  $\pm$  SEM;  $n = 10$  animals per group). (C) Anti-mSIRP $\alpha$  improves overall survival of Daudi-engrafted NSG mice when combined with a suboptimal dose of RTX. The vehicle refers to sterile saline (0.9% NaCl). Data were analyzed by Fisher's exact test with a one-sided critical region and a Bonferroni correction. \* indicate statistical differences compared to the vehicle control group: \* $p < 0.05$ , \*\*\* $p < 0.001$ ; ns, not significant.
