# Supplementary material for: Functional characterization of the selective pan-allele anti-SIRPα antibody ADU-1805 that blocks the SIRPα–CD47 innate immune checkpoint
Source: PubMed Central journal article supplement (PMC6894304; doi:10.1186/s40425-019-0772-0), 2019-12-04
Supplement: 40425_2019_772_MOESM8_ESM.pdf [file 40425_2019_772_MOESM8_ESM.pdf]

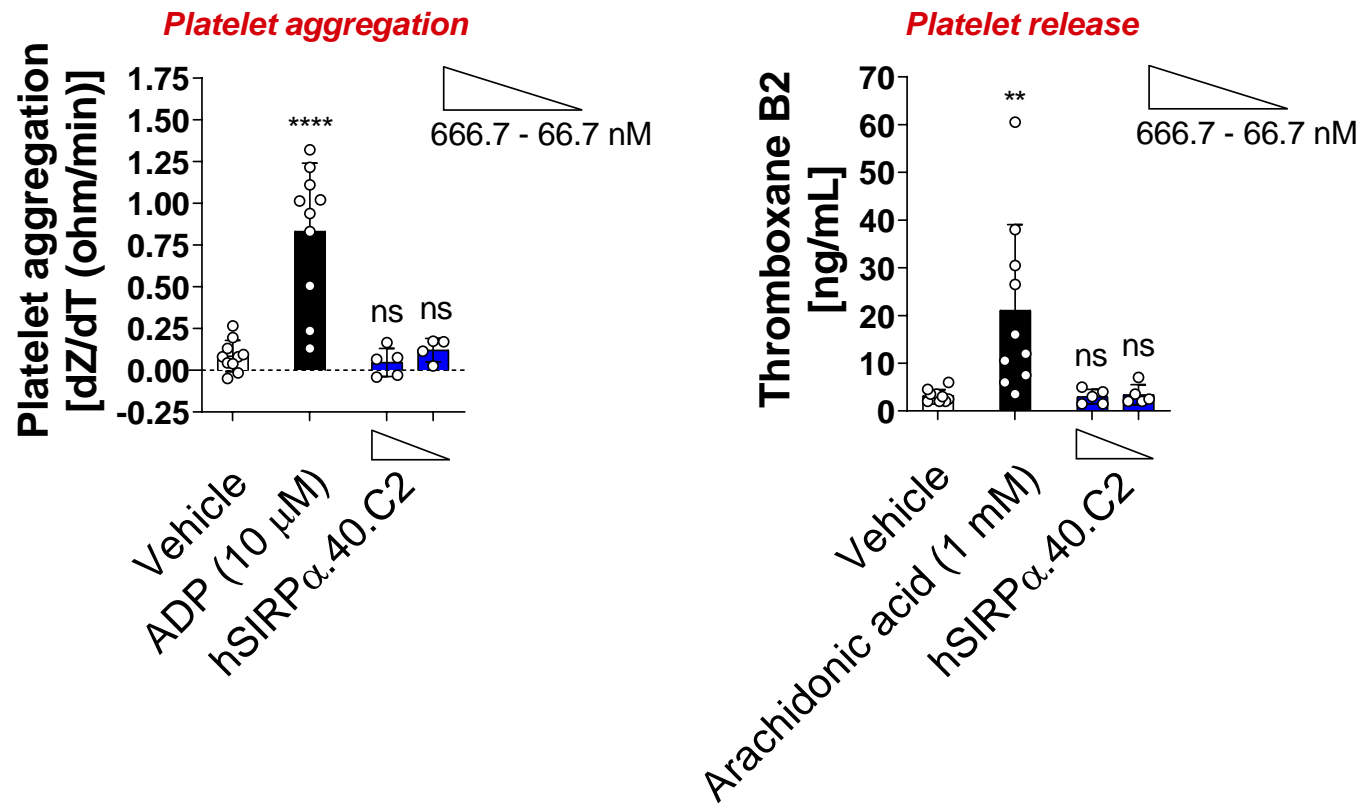

**Additional file 8: Figure S5.** Chimeric hSIRP $\alpha$ .40A does not impair platelet function.

Chimeric hSIRP $\alpha$ .40A (hSIRP $\alpha$ .40.C2) does not induce platelet aggregation or activation in human whole blood. Adenosine 5'-diphosphate sodium salt (ADP) and arachidonic acid serve as positive controls for the induction of platelet aggregation and platelet activation, respectively. Vehicle refers to the antibody formulation buffer: 10 mM L-Histidine pH 5.5 containing 0.1M sodium chloride. (Mean  $\pm$  SD; at least  $n = 4$  donors were tested per treatment). Data were analyzed by unpaired two-sided Student's t-test. \* indicate statistical differences compared to the vehicle control group: \*\* $p < 0.01$ , \*\*\*\* $p < 0.0001$ ; ns, not significant.
