# Supplementary material for: Functional characterization of the selective pan-allele anti-SIRPα antibody ADU-1805 that blocks the SIRPα–CD47 innate immune checkpoint
Source: PubMed Central journal article supplement (PMC6894304; doi:10.1186/s40425-019-0772-0), 2019-12-04
Supplement: 40425_2019_772_MOESM9_ESM.pdf [file 40425_2019_772_MOESM9_ESM.pdf]

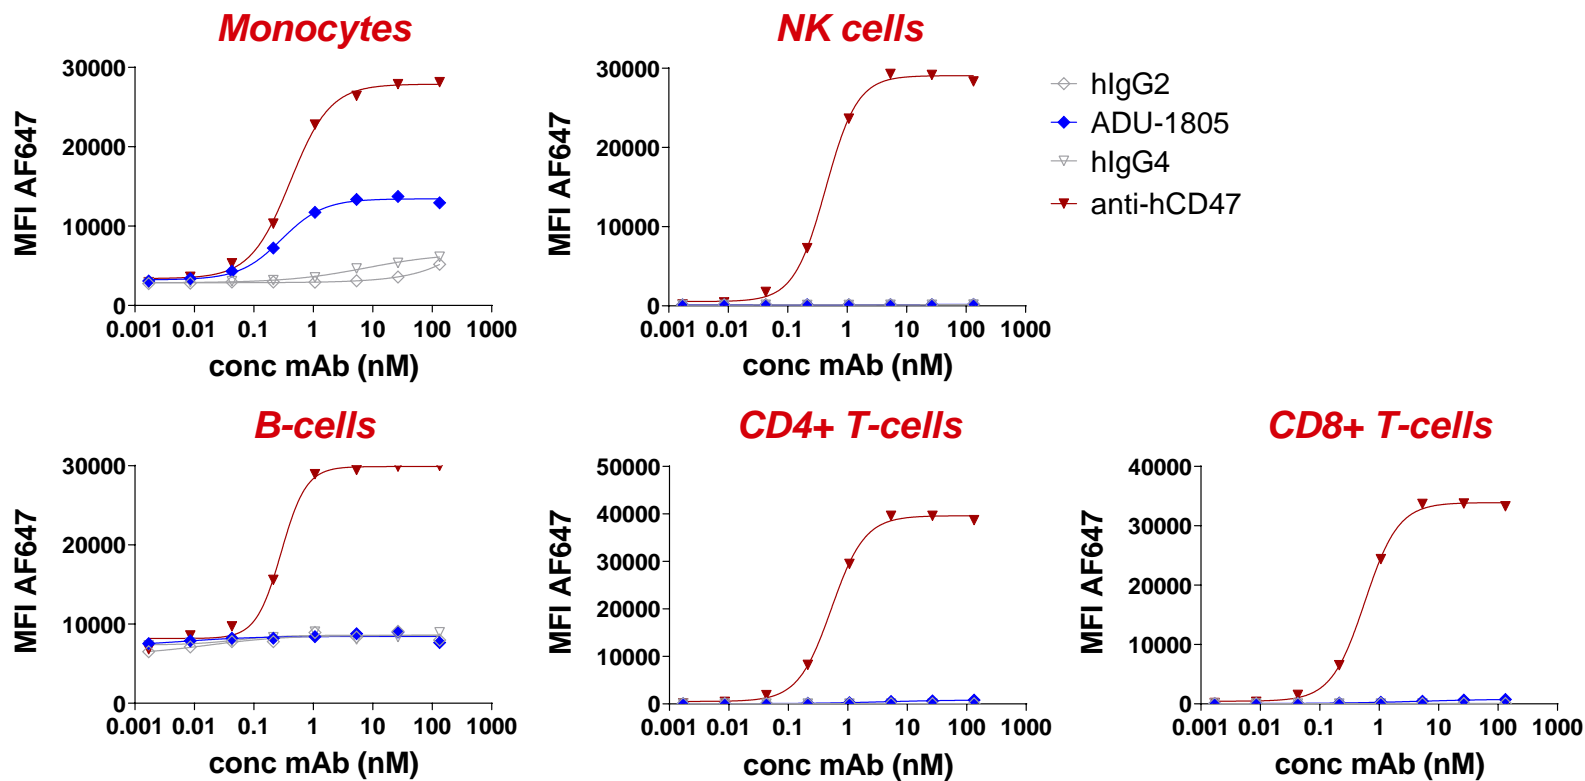

**Additional file 9: Figure S6.** Anti-hSIRP $\alpha$  has a more selective binding profile as compared to anti-CD47.

ADU-1805 binds SIRP $\alpha$ + myeloid cells (i.e. monocytes) but, unlike anti-CD47, does not appreciably bind to human T-cells, B-cells and NK cells obtained from PBMCs. (Mean; representative of  $n = 3$  donors is shown).
