# Supplementary material for: Functional characterization of the selective pan-allele anti-SIRPα antibody ADU-1805 that blocks the SIRPα–CD47 innate immune checkpoint
Source: PubMed Central journal article supplement (PMC6894304; doi:10.1186/s40425-019-0772-0), 2019-12-04
Supplement: 40425_2019_772_MOESM10_ESM.pdf [file 40425_2019_772_MOESM10_ESM.pdf]

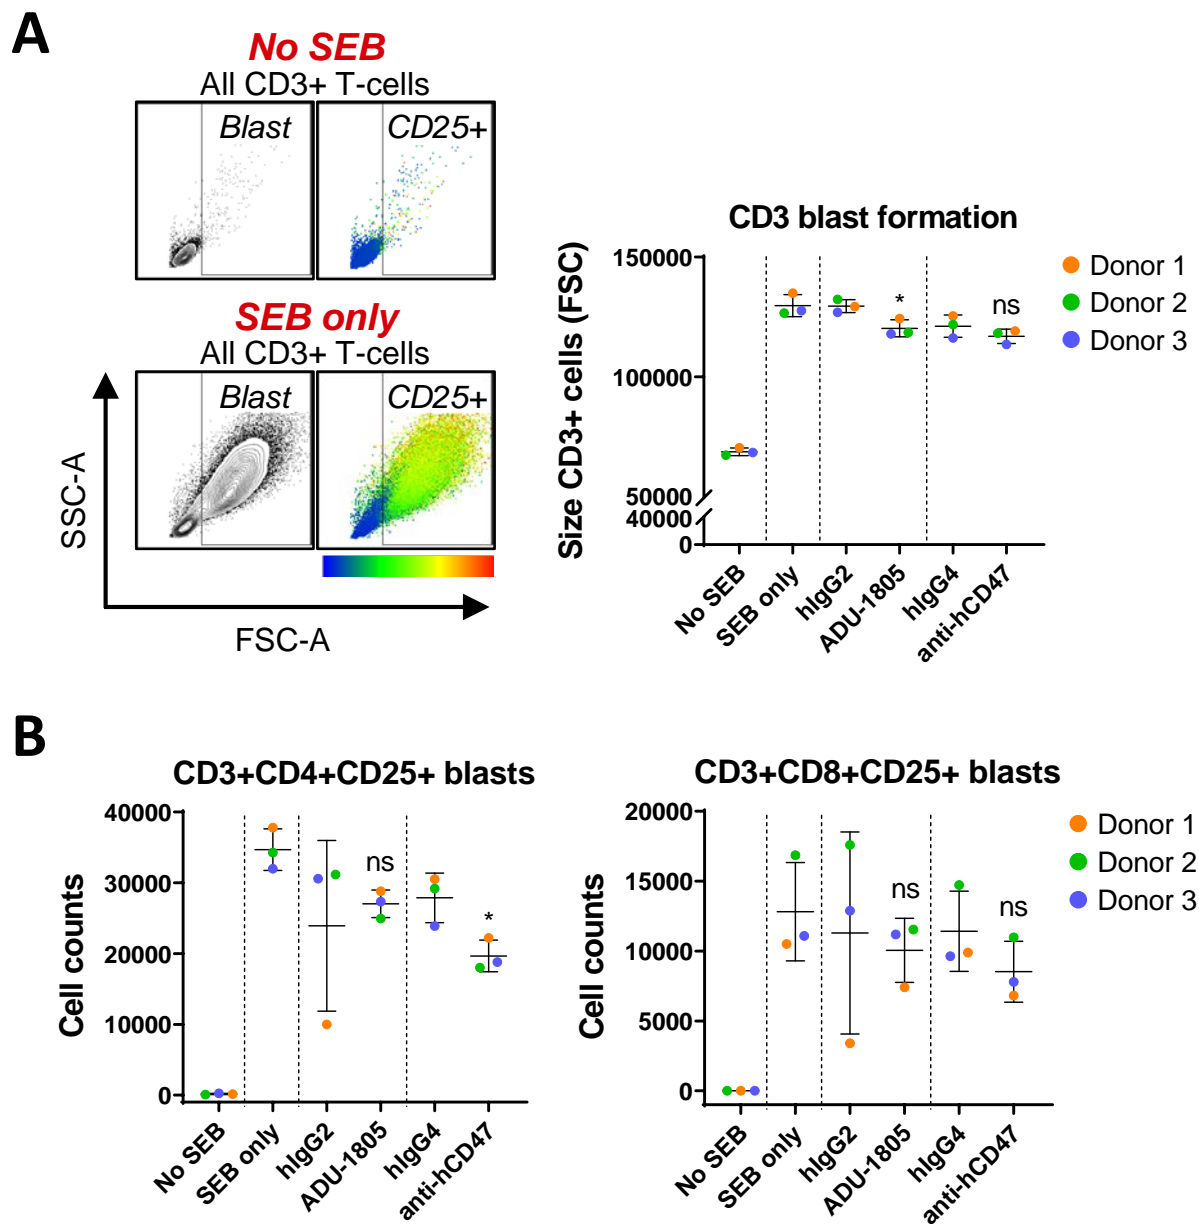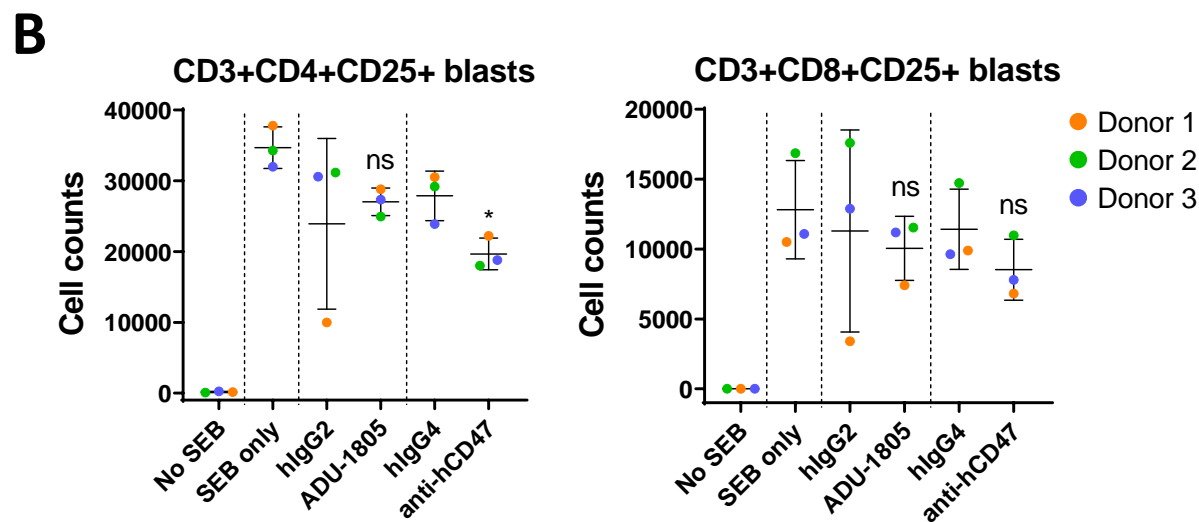

**Additional file 10: Figure S7.** Anti-hSIRP $\alpha$  does not impair CD4+ or CD8+ T-cell proliferation. (A) Illustration of CD3+ T-cell blast formation after 3 days treatment with SEB and indicated antibodies (used at 666.7 nM). Blast formation results in an increase in FSC-A and SSC-A. (B) Measurement of CD4+ and CD8+ T-cell activation. Anti-CD47 decreases CD4+ T-cell blast formation whereas ADU-1805 has no effect. (A, B: Mean;  $n = 3$  donors are shown as a representative of  $n = 6$  donors). Data were analyzed by unpaired two-sided Student's t-test. \* indicate statistical differences compared to the respective isotype control group: \* $p < 0.05$ ; ns, not significant.
