# Supplementary material for: Functional characterization of the selective pan-allele anti-SIRPα antibody ADU-1805 that blocks the SIRPα–CD47 innate immune checkpoint
Source: PubMed Central journal article supplement (PMC6894304; doi:10.1186/s40425-019-0772-0), 2019-12-04
Supplement: 40425_2019_772_MOESM12_ESM.pdf [file 40425_2019_772_MOESM12_ESM.pdf]

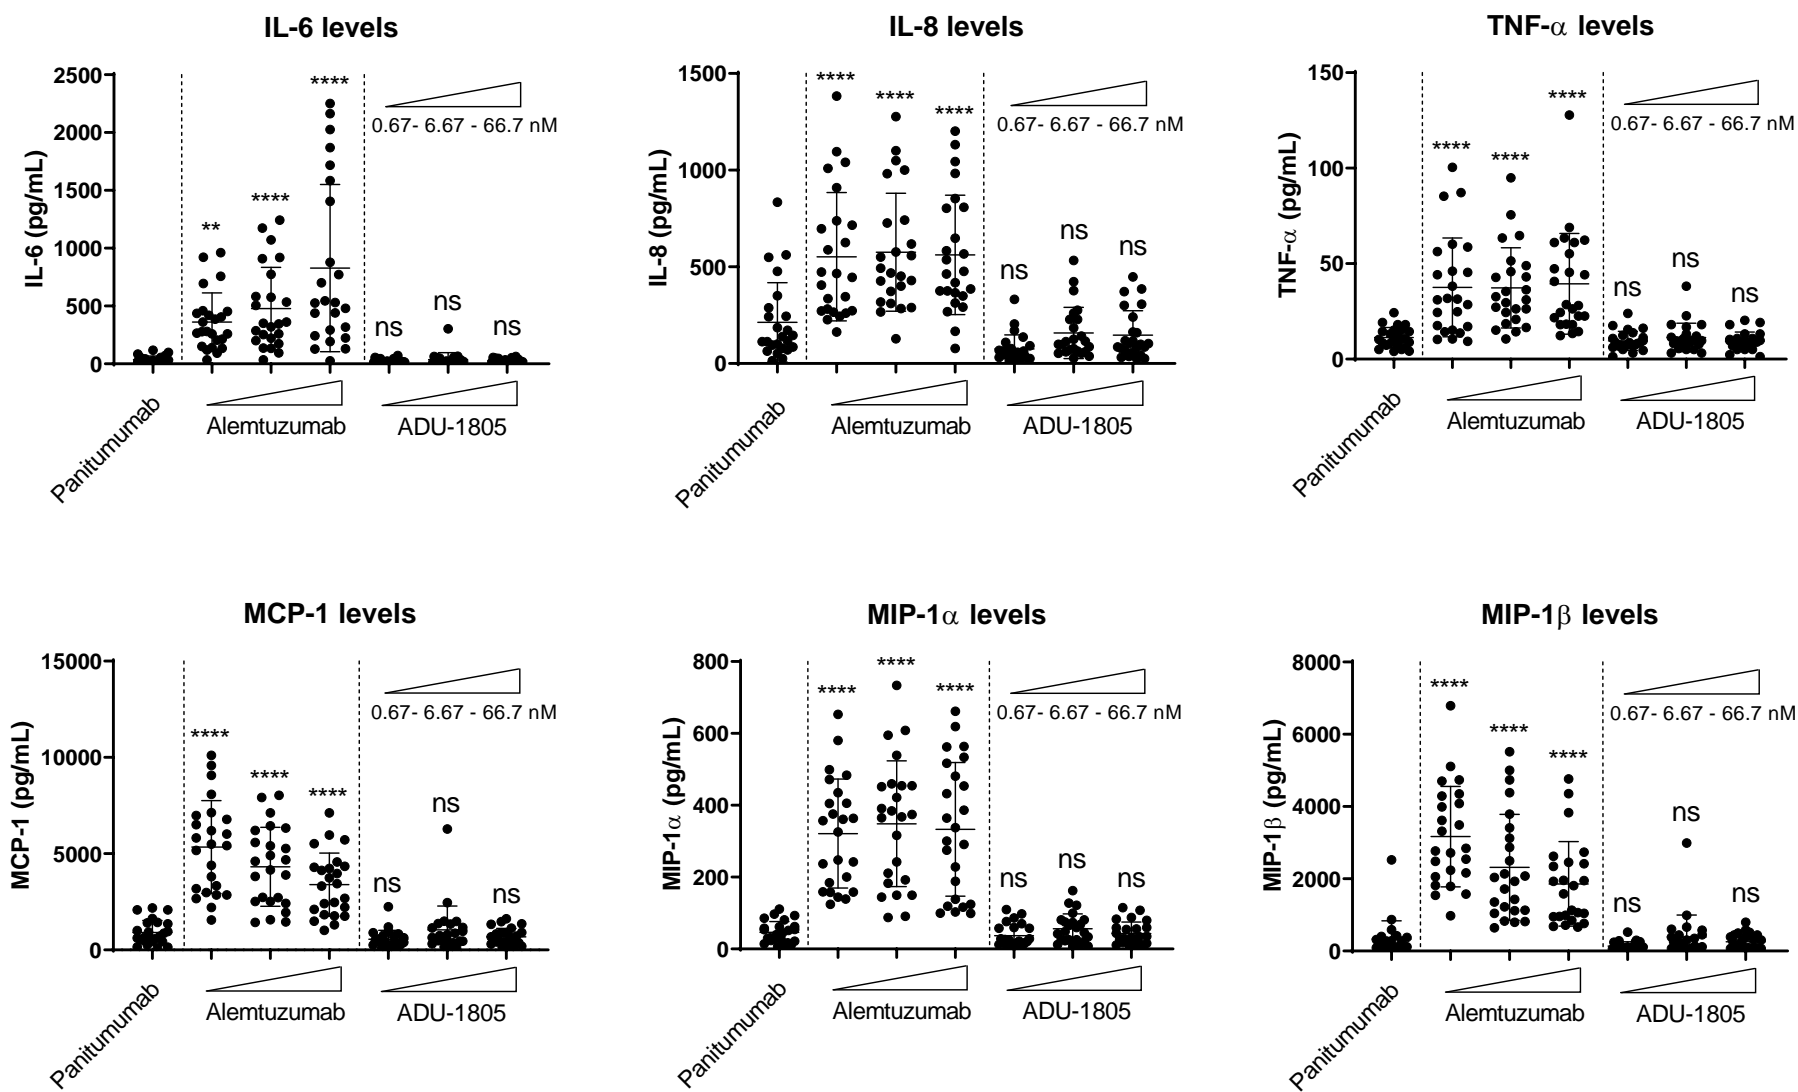

**Additional file 12: Figure S9.** ADU-1805 does not induce cytokine release in human whole blood.

Cytokine release was assessed in 24 human donors (each dot represents a single donor). Cytokine concentrations are obtained from 4x diluted supernatants that were taken after 16-24h. Results are shown for the following cytokines: IL-6, IL-8, TNF- $\alpha$ , MCP-1, MIP-1 $\alpha$ , and MIP-1 $\beta$ . ADU-1805 and the positive control alemtuzumab (anti-CD52) were tested in a concentration range (0.67-6.67-66.7 nM); the negative control panitumumab (anti-EGFR) was tested at the highest dose only (66.7 nM). (Mean  $\pm$  SD;  $n = 24$  donors). Data were analyzed by one-way ANOVA with multiple comparison correction. \* indicate statistical differences compared to the panitumumab control group: \* $p < 0.05$ , \*\* $p < 0.01$ , \*\*\* $p < 0.001$ , \*\*\*\* $p < 0.0001$ ; ns, not significant.
