# Supplementary material for: Functional characterization of the selective pan-allele anti-SIRPα antibody ADU-1805 that blocks the SIRPα–CD47 innate immune checkpoint
Source: PubMed Central journal article supplement (PMC6894304; doi:10.1186/s40425-019-0772-0), 2019-12-04
Supplement: 40425_2019_772_MOESM13_ESM.pdf [file 40425_2019_772_MOESM13_ESM.pdf]

## A Binding to cynomolgus SIRP $\alpha$ receptor variants

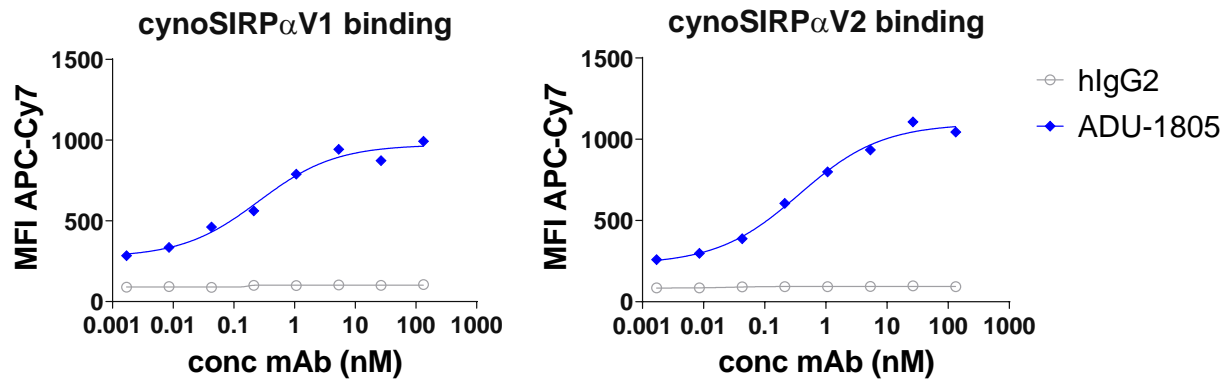

## B

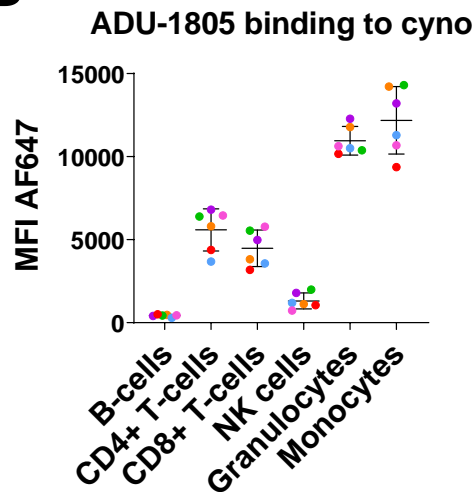

**Additional file 13: Figure S10.** Cross-reactivity of ADU-1805 to cynomolgus monkey SIRP $\alpha$ .

(A) ADU-1805 binds to cynomolgus SIRP $\alpha$ V1 (NM\_001284750.1) and SIRP $\alpha$ V2 (XP\_015313155.1) expressed in CHO-K1 cells. (Mean; representative of  $n = 2$  is shown). (B) Assessment of AF647-labeled ADU-1805 (used at 66.7 nM) binding to cynomolgus leukocytes present in erythrocyte-depleted whole blood ( $n = 6$  animals). Antibody labeling of ADU-1805 was performed with Alexa Fluor 647 NHS Ester (Thermo Fisher Scientific) according to the manufacturer's instructions.
